# Supplementary material
Source: publisher site journal article supplement (https://www.dovepress.com/get_supplementary_file.php?f=436673.docx)
Supplement: Supplementary file 1 [file get_supplementary_file.php]

**Supplementary Table 1:** Serum iron levels in male population (n = 68). The differences between the males were determined using an independent unpaired t-test.

| Parameters | Male (68) | | |
| --- | --- | --- | --- |
| Normal  Serum iron  (>80 µg/dL)  (n = 20) | Low  Serum iron  (<80 µg/dL)  (n = 48) | P value |
| **RBCs (x1012/L)** | 5.5± 0.4 | 5.4±0.4 | 0.3443 |
| **Hgb (g/dL)** | 15.2± 1.1 | 15.3±1.0 | 0.7130 |
| **Hct (%)** | 46.6±3.2 | 45.5± 3.6 | 0.2333 |
| **MCV (fL)** | 84.6±3.5 | 85.2±4.9 | 0.6149 |
| **MCH (pg)** | 27.5±1.4 | 28.9± 2.4 | 0.0155 |
| **MCHC (g/dL)** | 32.5±0.7 | 33.6±1.5 | 0.0021 |
| **RDW (%)** | 16.1±1.1 | 17.8±3.8 | 0.0490 |
| **Folic acid (ng/mL)** | 13.1±4.9 | 9.7±4.0 | 0.0036 |
| **Vitamin B12 (pg/mL)** | 633±441 | 520±294 | 0.2168 |
| **Serum iron (µg/dL)** | 101±18 | 50± 15 | <0.0001 |

**Supplementary Table 2**: Correlation of the vitamin B12, folate, serum iron, ferritin and hemoglobin among male and female population.

|  | Male population | | | | |  | Female population | | | | |
| --- | --- | --- | --- | --- | --- | --- | --- | --- | --- | --- | --- |
|  | Vitamin B12 | Folate | S. iron | Ferritin | Hb | Vitamin B12 | Folate | S. iron | Ferritin | Hb |
| Vitamin B12 |  | R=0.25  P=0.044 | R=0.15  P=0.22 | R=0.033  P=0.79 | R=0.0061  P=0.96 |  | R=0.22  P=0.044 | R=0.12  P=0.3 | R=0.2  P=0.24 | R=0.0022  P=0.98 |
| Folate | R=0.25  P=0.044 |  | R=0.46  P=0.0009 | R=0.078  P=0.54 | R=0.098  P=0.43 | R=0.22  P=0.044 |  | R=0.13  P=0.25 | R=0.34  P=0.037 | R=0.093  P=0.39 |
| S. Iron | R=0.15  P=0.22 | R=0.46  P=0.00009 |  | R=0.063  P=0.62 | R=0.12  P=0.34 | R=0.12  P=0.3 | R=0.13  P=0.25 |  | R=0.069  P=0.68 | R=0.26  P=0.019 |
